# Supplementary material
Source: PubMed Central journal article supplement (PMC11632653)
Supplement: Supplementary_Data.pdf [file Supplementary_Data.pdf]

Table SI. Association of EMP3 expression with clinicopathological indicators and patient outcomes (n=166).

| Indicator       | EMP3 expression (%) |          |           |            | P-value |
|-----------------|---------------------|----------|-----------|------------|---------|
|                 | - (n=64)            | + (n=30) | ++ (n=13) | +++ (n=59) |         |
| Stage           |                     |          |           |            | 0.836   |
| I               | 12 (19)             | 5 (17)   | 1 (8)     | 14 (24)    |         |
| II              | 37 (58)             | 20 (66)  | 10 (77)   | 33 (56)    |         |
| III             | 15 (23)             | 5 (17)   | 2 (15)    | 12 (20)    |         |
| pT status       |                     |          |           |            | 0.493   |
| 1               | 20 (31)             | 7 (23)   | 1 (8)     | 20 (34)    |         |
| 2               | 39 (61)             | 22 (73)  | 11 (84)   | 35 (59)    |         |
| 3/4             | 5 (8)               | 1 (4)    | 1 (8)     | 4 (7)      |         |
| Nodal status    |                     |          |           |            | 0.180   |
| Negative        | 30 (47)             | 18 (60)  | 8 (62)    | 39 (66)    |         |
| Positive        | 34 (53)             | 12 (40)  | 5 (38)    | 20 (34)    |         |
| ER status       |                     |          |           |            | 0.713   |
| Negative        | 20 (31)             | 8 (27)   | 3 (23)    | 13 (22)    |         |
| Positive        | 44 (69)             | 22 (73)  | 10 (77)   | 46 (78)    |         |
| PR status       |                     |          |           |            | 0.608   |
| Negative        | 35 (55)             | 12 (40)  | 6 (46)    | 29 (49)    |         |
| Positive        | 29 (45)             | 18 (60)  | 7 (54)    | 30 (51)    |         |
| HER2            |                     |          |           |            | 0.192   |
| Not amplified   | 50 (78)             | 19 (63)  | 12 (92)   | 42 (71)    |         |
| Amplified       | 14 (22)             | 11 (37)  | 1 (8)     | 17 (29)    |         |
| Recurrence      |                     |          |           |            | 0.853   |
| Negative        | 54 (84)             | 24 (80)  | 10 (77)   | 47 (80)    |         |
| Positive        | 10 (16)             | 6 (20)   | 3 (23)    | 12 (20)    |         |
| Survival status |                     |          |           |            | 0.593   |
| Alive           | 51 (80)             | 27 (90)  | 10 (77)   | 48 (81)    |         |
| Deceased        | 13 (20)             | 3 (10)   | 3 (23)    | 11 (19)    |         |

EMP, epithelial membrane protein; pT, pathological primary tumor; ER, estrogen receptor; PR, progesterone receptor; HER, human epidermal growth factor receptor
